# Supplementary material for: WDR23 regulates NRF2 independently of KEAP1
Source: PubMed Central journal article supplement (PMC5428976; doi:10.1371/journal.pgen.1006762), 2017-04-28
Supplement: pgen.1006762.s001.pdf [file pgen.1006762.s001.pdf]

A

BLAST e-value Species Hit Description % Length

Invertebrates

|          |                        |                |                                                                                                                                                                                                         |       |
|----------|------------------------|----------------|---------------------------------------------------------------------------------------------------------------------------------------------------------------------------------------------------------|-------|
| 3.4e-224 | <i>C. brenneri</i>     | CN:CN26609     | CBN17984                                                                                                                                                                                                | 90.4% |
| 1.9e-217 | <i>C. briggsae</i>     | BP:CBP37043    | CBR-WDR-23                                                                                                                                                                                              | 93.3% |
| 4.1e-86  | <i>P. pacificus</i>    | PP:PP43443     | PPA-WDR-23                                                                                                                                                                                              | 65.5% |
| 7.8e-86  | <i>B. malayi</i>       | BM:BM31075     | Bm3045, isoform e                                                                                                                                                                                       | 73.0% |
| 1.7e-82  | <i>O. volvulus</i>     | OV:OVP07517    | OVOC1095                                                                                                                                                                                                | 71.6% |
| 1.4e-79  | <i>C. japonica</i>     | JA:JA42848     | CJA27743                                                                                                                                                                                                | 46.1% |
| 9.1e-75  | <i>C. remanei</i>      | RP:RP41093     | CRE-WDR-23                                                                                                                                                                                              | 37.0% |
| 1.1e-13  | <i>D. melanogaster</i> | FLYBASE:CG9945 | Flybase gene name is CG9945-PA                                                                                                                                                                          | 78.6% |
| 4e-09    | <i>S. cerevisiae</i>   | SGD:YCR072C    | WD-repeat protein involved in ribosome biogenesis; may interact with ribosomes; required for maturation and efficient intra-nuclear transport or pre-60S ribosomal subunits, localizes to the nucleolus | 26.4% |

Vertebrates

|         |                      |                         |                                                  |       |
|---------|----------------------|-------------------------|--------------------------------------------------|-------|
| 9.8e-83 | <i>H. sapiens</i>    | ENSEMBL:ENSP00000380146 | Isoform 2 of DDB1- and CUL4-associated factor 11 | 65.1% |
| 4.9e-82 | <i>R. norvegicus</i> | SW:Q5M9G8               | DDB1- and CUL4-associated factor 11              | 65.1% |
| 4.9e-82 | <i>B. taurus</i>     | SW:Q5E9I8               | DDB1- and CUL4-associated factor 11              | 64.9% |
| 1e-81   | <i>M. musculus</i>   | SW:Q91VU6               | DDB1- and CUL4-associated factor 11              | 71.8% |

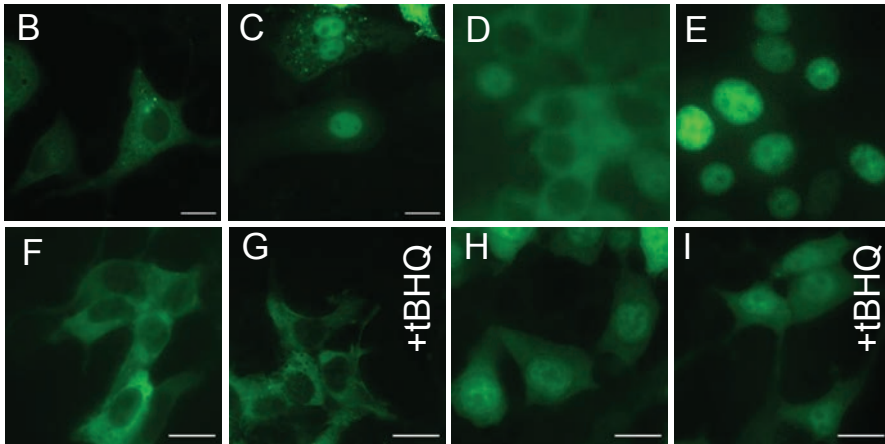

Lo and Curran  
Figure S1
