# Supplementary material for: WDR23 regulates NRF2 independently of KEAP1
Source: PubMed Central journal article supplement (PMC5428976; doi:10.1371/journal.pgen.1006762), 2017-04-28
Supplement: pgen.1006762.s003.pdf [file pgen.1006762.s003.pdf]

**A**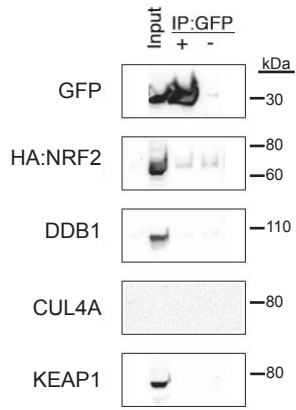**B**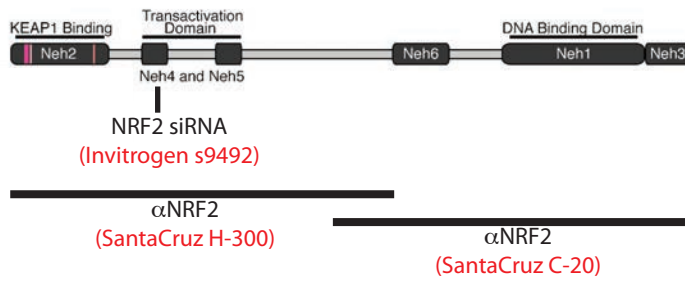**C**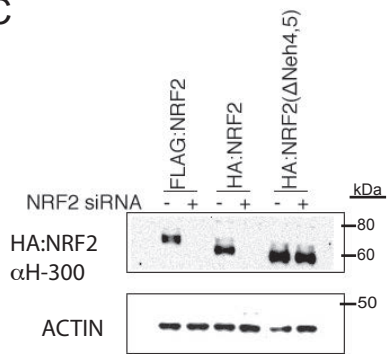**D**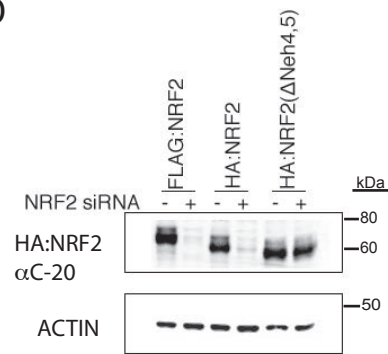

**Lo and Curran**  
**Figure S3**
