# Supplementary material for: WDR23 regulates NRF2 independently of KEAP1
Source: PubMed Central journal article supplement (PMC5428976; doi:10.1371/journal.pgen.1006762), 2017-04-28

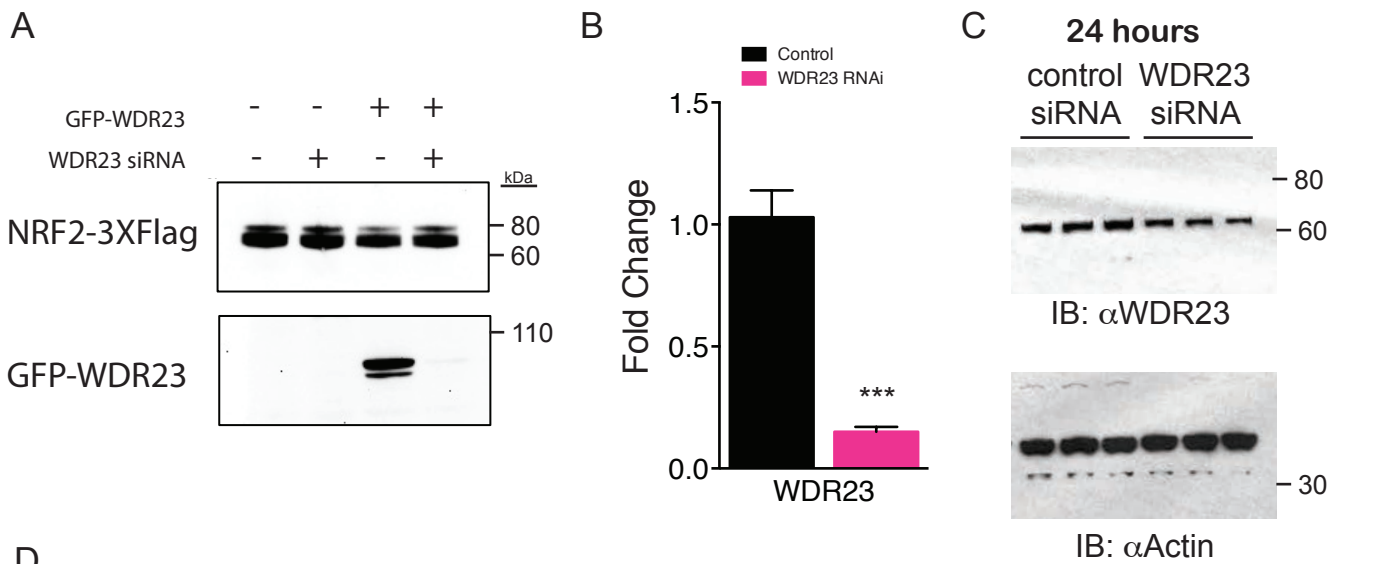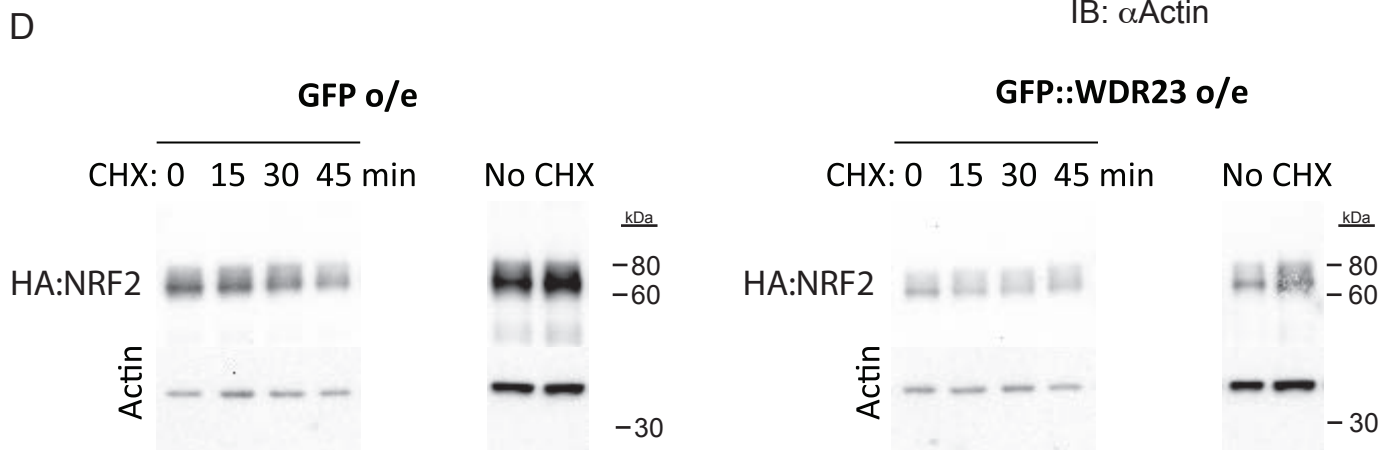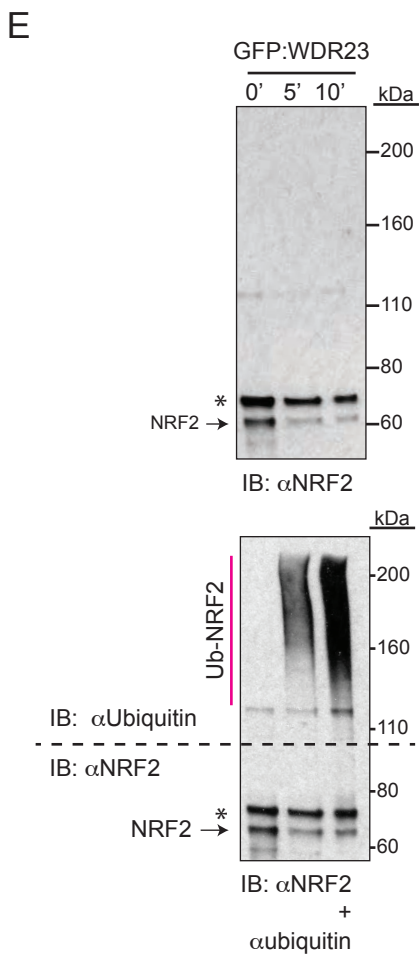

Supplement: pgen.1006762.s004.pdf [file pgen.1006762.s004.pdf]
