# Supplementary material for: WDR23 regulates NRF2 independently of KEAP1
Source: PubMed Central journal article supplement (PMC5428976; doi:10.1371/journal.pgen.1006762), 2017-04-28

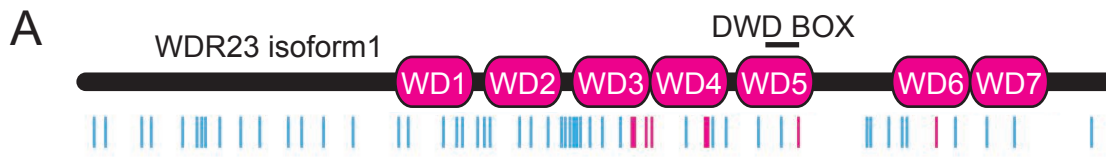

**B**

| Sample          | KEAP1 Mutation | CDS Mutation | Tissue | Fold WDR23 |
|-----------------|----------------|--------------|--------|------------|
| TCGA-46-6025-01 | p.Q75*         | c.223C>T     | Lung   | -2.51      |
| TCGA-91-6848-01 | p.D236N        | c.706G>A     | Lung   | -2.34      |
| TCGA-35-5375-01 | p.E593fs*2     | c.1777delG   | Lung   | CNV 4.21   |
| TCGA-49-4488-01 | p.Q284L        | c.851A>T     | Lung   | 2.06       |
| TCGA-4B-A93V-01 | p.L199F        | c.597G>T     | Lung   | 4.48       |
| TCGA-55-A4DF-01 | p.?            | c.1708+1G>T  | Lung   | 3.01       |
| TCGA-73-4670-01 | p.V123L        | c.367G>T     | Lung   | 2.08       |
| TCGA-73-4677-01 | p.K287*        | c.859A>T     | Lung   | 3.63       |
| TCGA-86-8358-01 | p.G558E        | c.1673G>A    | Lung   | 3.58       |
| TCGA-86-A4D0-01 | p.G480W        | c.1438G>T    | Lung   | 2.53       |
| TCGA-43-6143-01 | p.I506V        | c.1516A>G    | Lung   | 3.02       |
| TCGA-44-7667-01 | p.?            | c.1709-1G>T  | Lung   | 4.84       |

**C**

| Sample          | WDR23 Mutation | CDS Mutation | Tissue  | Fold KEAP1 |
|-----------------|----------------|--------------|---------|------------|
| TCGA-78-7220-01 | p.R145L        | c.434G>T     | Lung    | 2.07       |
| TCGA-BR-8361-01 | p.R341W        | c.1021C>T    | Stomach | 2.43       |
| TCGA-BR-8372-01 | p.Q70R         | c.209A>G     | Stomach | 2.15       |
| TCGA-CG-5721-01 | p.R265H        | c.794G>A     | Stomach | 3.41       |
| TCGA-BR-8361-01 | p.R341W        | c.1021C>T    | Stomach | 2.43       |

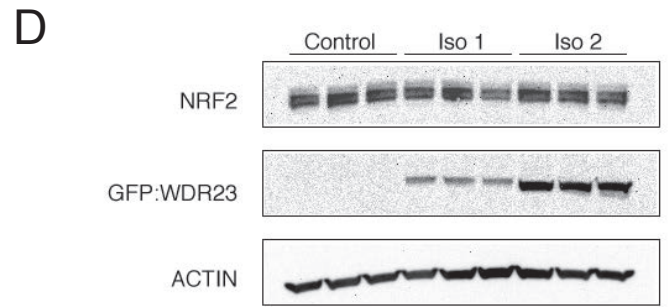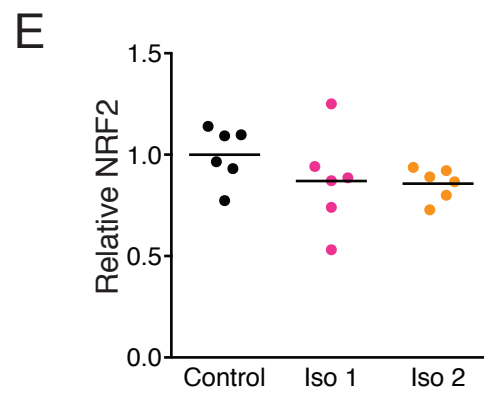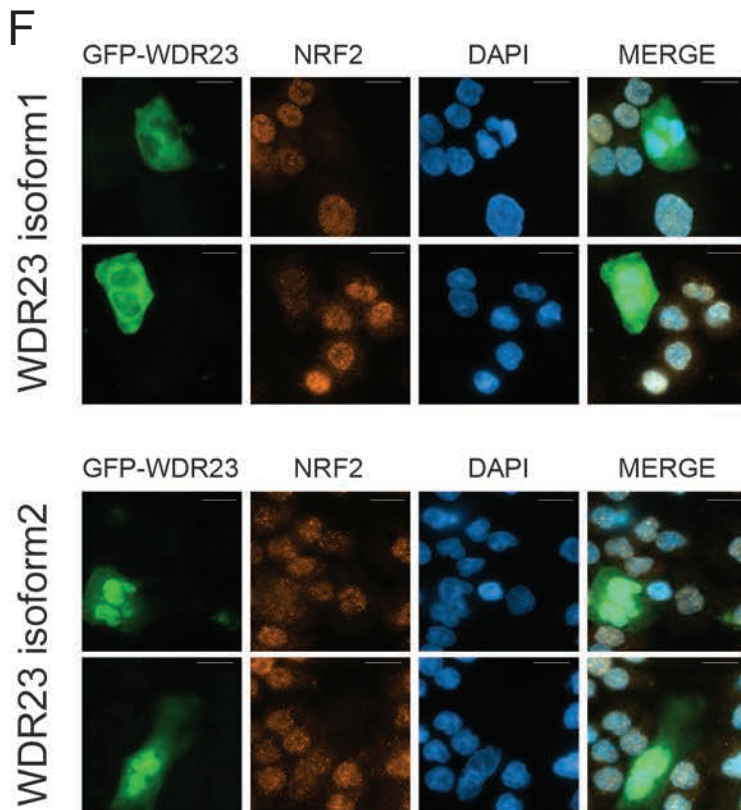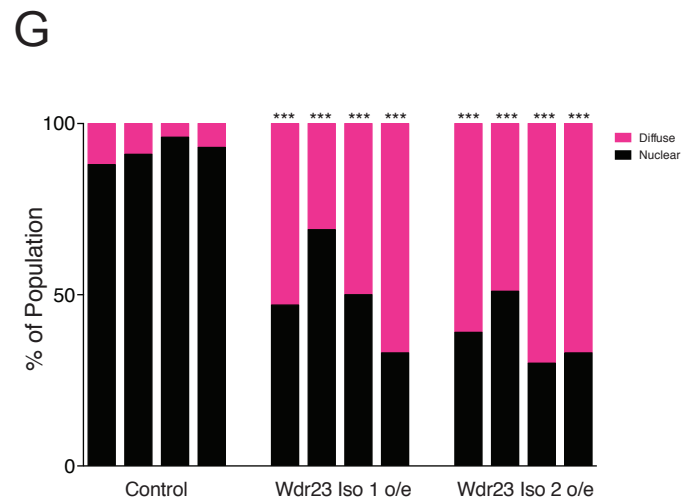

Supplement: pgen.1006762.s011.pdf [file pgen.1006762.s011.pdf]
