# Supplementary material for: WDR23 regulates NRF2 independently of KEAP1
Source: PubMed Central journal article supplement (PMC5428976; doi:10.1371/journal.pgen.1006762), 2017-04-28
Supplement: pgen.1006762.s012.pdf [file pgen.1006762.s012.pdf]

**S1 Table. RNAi efficiencies**

| Genotype        | siRNA        | Average Fold Change <sup>1</sup> | S.E.M. | P-value <sup>2</sup> |
|-----------------|--------------|----------------------------------|--------|----------------------|
| Wild-type       | <i>WDR23</i> | 0.147                            | 0.018  | ***                  |
| Wild-type       | <i>NRF2</i>  | 0.548                            | 0.047  | ***                  |
| Wild-type       | <i>KEAP1</i> | 0.649                            | 0.054  | ***                  |
| WDR23 Iso 1 o/e | <i>KEAP1</i> | 0.531                            | 0.025  | ***                  |
| WDR23 Iso 2 o/e | <i>KEAP1</i> | 0.590                            | 0.046  | ***                  |

<sup>1</sup> As compared to wild-type with control siRNA

<sup>2</sup> \*P<0.05, \*\*P<0.01, \*\*\*P<0.001
