# Supplementary material for: WDR23 regulates NRF2 independently of KEAP1
Source: PubMed Central journal article supplement (PMC5428976; doi:10.1371/journal.pgen.1006762), 2017-04-28
Supplement: pgen.1006762.s013.pdf [file pgen.1006762.s013.pdf]

**S2 Table. *C. elegans wdr-23* mutants**

| Strain | Allele        | Amino Acid Mutation    |
|--------|---------------|------------------------|
| SPC296 | <i>lax101</i> | Q80Stop                |
| SPC318 | <i>lax123</i> | D387N                  |
| SPC302 | <i>lax124</i> | T400I                  |
| SPC206 | <i>lax126</i> | W339Stop               |
| SPC299 | <i>lax129</i> | Frameshift, early stop |
| SPC315 | <i>lax134</i> | H310Y                  |
| SPC303 | <i>lax211</i> | D313N                  |
| SPC317 | <i>lax213</i> | G460R                  |
