# Supplementary material for: WDR23 regulates NRF2 independently of KEAP1
Source: PubMed Central journal article supplement (PMC5428976; doi:10.1371/journal.pgen.1006762), 2017-04-28
Supplement: pgen.1006762.s014.pdf [file pgen.1006762.s014.pdf]

**S3 Table . DWD-box motif homology**

|                        |                             |
|------------------------|-----------------------------|
| DWD-consensus          | sssxDxxh <sup>x</sup> hWDhR |
| <i>H. sapiens</i>      | SNSKDQTIKLWDIR              |
| <i>M. musculus</i>     | SNSKDQTIKLWDIR              |
| <i>A. melanoleuca</i>  | SNSKDQTIKLWDIR              |
| <i>T. guttata</i>      | SGSLDKTIRLWDLR              |
| <i>D. melanogaster</i> | SNSKDQSIKIWDIR              |
| <i>S. pombe</i>        | SASSDGEVKLWDIR              |
| <i>S. cerevisiae</i>   | SSSKDGTIKIWDTV              |
