# Supplementary material for: WDR23 regulates NRF2 independently of KEAP1
Source: PubMed Central journal article supplement (PMC5428976; doi:10.1371/journal.pgen.1006762), 2017-04-28
Supplement: pgen.1006762.s015.pdf [file pgen.1006762.s015.pdf]

# S4 Table. Raw MTT cell survival assay data

## Experiment 1

| Genotype  | Treatment          | A540 | Average | SEM       | Relative  | Average   | SEM       |           |           |
|-----------|--------------------|------|---------|-----------|-----------|-----------|-----------|-----------|-----------|
| Control   | Control            |      | 2.553   | 2.2538    | 0.4070775 | 1.1337741 | 1         | 0.1606183 |           |
| Control   | 25uM Cisplatin     |      | 2.553   |           |           | 1.1337741 |           |           |           |
|           |                    |      | 1.4481  |           |           | 0.6425149 |           |           |           |
|           |                    |      | 2.758   |           |           | 1.2237111 |           |           |           |
|           |                    |      | 2.7057  | 2.66135   | 0.0628382 | 1.2005038 | 1.1808279 | 0.027881  |           |
|           |                    |      | 2.6012  |           |           | 1.1541397 |           |           |           |
| Control   | 50uM Cisplatin     |      | 2.553   |           |           | 1.1337741 |           |           |           |
|           |                    |      | 2.5249  |           |           | 1.1202857 |           |           |           |
|           |                    |      | 2.8136  |           |           | 1.2483805 |           |           |           |
|           |                    |      | 2.8532  | 2.7522    | 0.1129219 | 1.2659508 | 1.2211376 | 0.0501029 |           |
|           |                    |      | 2.8551  |           |           | 1.2667939 |           |           |           |
| Control   | 25uM Etoposide     |      | 2.553   |           |           | 1.1337741 |           |           |           |
|           |                    |      | 1.2957  |           |           | 0.5748957 | 0.5843243 | 0.0199729 |           |
|           |                    |      | 1.1983  |           |           | 0.5318798 |           |           |           |
|           |                    |      | 1.3863  |           |           | 0.6150945 |           |           |           |
|           |                    |      | 1.3875  | 1.31695   | 0.0450149 | 0.6156269 |           |           |           |
| Control   | 100uM Etoposide    |      | 2.553   |           |           | 1.1337741 |           |           |           |
|           |                    |      | 1.0281  |           |           | 0.4561629 | 0.4743544 | 0.0088951 |           |
|           |                    |      | 1.0536  |           |           | 0.4674771 |           |           |           |
|           |                    |      | 1.0718  | 1.0691    | 0.0200478 | 0.4755524 |           |           |           |
|           |                    |      | 1.1229  |           |           | 0.4982252 |           |           |           |
| Control   | 0.25uM Doxorubicin |      | 2.553   |           |           | 1.1337741 |           |           |           |
|           |                    |      | 1.0095  |           |           | 0.4479102 | 0.4352205 | 0.005064  |           |
|           |                    |      | 0.9643  |           |           | 0.4278552 |           |           |           |
|           |                    |      | 0.9808  | 0.9809    | 0.0114132 | 0.4263022 |           |           |           |
|           |                    |      | 0.989   |           |           | 0.4388144 |           |           |           |
| Control   | 0.5uM Doxorubicin  |      | 2.553   |           |           | 1.1337741 |           |           |           |
|           |                    |      | 0.9387  |           |           | 0.4164966 | 0.3667916 | 0.0234103 |           |
|           |                    |      | 0.7454  |           |           | 0.3307303 |           |           |           |
|           |                    |      | 0.8943  |           |           | 0.3967965 |           |           |           |
|           |                    |      | 0.7283  | 0.826675  | 0.0527621 | 0.3231431 |           |           |           |
| Control   | 1uM Doxorubicin    |      | 2.553   |           |           | 1.1337741 |           |           |           |
|           |                    |      | 0.7866  |           |           | 0.341024  | 0.3224665 | 0.0170064 |           |
|           |                    |      | 0.8042  |           |           | 0.3568196 |           |           |           |
|           |                    |      | 0.6299  | 0.726775  | 0.038329  | 0.2794835 |           |           |           |
|           |                    |      | 0.7044  |           |           | 0.3125388 |           |           |           |
| Genotype  | Treatment          | A540 | Average | SEM       | Relative  | Average   | SEM       | ttest     |           |
| Isoform 1 | Control            |      | 2.7779  | 3.185     | 0.1400786 | 0.8721821 | 1         | 0.0439807 |           |
| Isoform 1 | 25uM Cisplatin     |      | 2.7779  |           |           | 0.8721821 |           |           |           |
|           |                    |      | 3.4118  |           |           | 1.0712088 |           |           |           |
|           |                    |      | 3.2432  |           |           | 1.0182732 |           |           |           |
|           |                    |      | 3.3071  |           |           | 1.0383359 |           |           |           |
|           |                    |      | 2.5774  | 2.734725  | 0.150975  | 0.8081633 | 0.8586264 | 0.0474019 | 0.0011338 |
| Isoform 1 | 50uM Cisplatin     |      | 2.7779  |           |           | 0.8721821 |           |           |           |
|           |                    |      | 3.0276  |           |           | 0.9505808 |           |           |           |
|           |                    |      | 2.3919  |           |           | 0.750989  |           |           |           |
|           |                    |      | 2.6924  | 2.698325  | 0.0617355 | 0.8453375 | 0.8471978 | 0.0193832 | 0.0012542 |
|           |                    |      | 2.5336  |           |           | 0.7854788 |           |           |           |
| Isoform 1 | 25uM Etoposide     |      | 2.7779  |           |           | 0.8721821 |           |           |           |
|           |                    |      | 2.7389  |           |           | 0.8599372 |           |           |           |
|           |                    |      | 2.8284  |           |           | 0.8880377 |           |           |           |
|           |                    |      | 1.1967  | 1.136225  | 0.0381761 | 0.37573   | 0.3567425 | 0.0119862 | 0.0001053 |
|           |                    |      | 1.1059  |           |           | 0.3710316 |           |           |           |
| Isoform 1 | 100uM Etoposide    |      | 2.7779  |           |           | 0.8721821 |           |           |           |
|           |                    |      | 1.1467  |           |           | 0.3600314 |           |           |           |
|           |                    |      | 1.1756  |           |           | 0.3691052 |           |           |           |
|           |                    |      | 1.0536  | 1.07835   | 0.0086245 | 0.3308006 | 0.3385714 | 0.0027079 | 0.000134  |
|           |                    |      | 1.065   |           |           | 0.3406593 |           |           |           |
| Isoform 1 | 0.25uM Doxorubicin |      | 2.7779  |           |           | 0.8721821 |           |           |           |
|           |                    |      | 1.0814  |           |           | 0.339529  |           |           |           |
|           |                    |      | 1.0934  |           |           | 0.3432967 |           |           |           |
|           |                    |      | 1.1372  | 0.8883    | 0.094862  | 0.3570487 | 0.2789011 | 0.029784  | 0.0060881 |
|           |                    |      | 0.8984  |           |           | 0.2789325 |           |           |           |
| Isoform 1 | 0.5uM Doxorubicin  |      | 2.7779  |           |           | 0.8721821 |           |           |           |
|           |                    |      | 0.8771  |           |           | 0.225903  |           |           |           |
|           |                    |      | 0.8505  |           |           | 0.267033  |           |           |           |
|           |                    |      | 0.7521  | 0.742225  | 0.019719  | 0.2361381 | 0.2330377 | 0.0061912 | 0.0041085 |
|           |                    |      | 0.7211  |           |           | 0.226405  |           |           |           |
| Isoform 1 | 1uM Doxorubicin    |      | 2.7779  |           |           | 0.8721821 |           |           |           |
|           |                    |      | 0.7029  |           |           | 0.2208593 |           |           |           |
|           |                    |      | 0.7929  |           |           | 0.2489482 |           |           |           |
|           |                    |      | 0.7153  | 0.7409    | 0.0353093 | 0.224584  | 0.2326217 | 0.0110861 | 0.0031832 |
|           |                    |      | 0.7144  |           |           | 0.2243014 |           |           |           |
|           | 0.6887             |      |         | 0.2162323 |           |           |           |           |           |
|           | 0.8452             |      |         | 0.2653689 |           |           |           |           |           |
| Genotype  | Treatment          | A540 | Average | SEM       | Relative  | Average   | SEM       | ttest     |           |
| Isoform 2 | Control            |      | 3.2002  | 3.2007    | 0.0606963 | 0.9598438 | 1         | 0.0189835 |           |
| Isoform 2 | 25uM Cisplatin     |      | 3.2002  |           |           | 0.9598438 |           |           |           |
|           |                    |      | 3.2989  |           |           | 1.0306808 |           |           |           |
|           |                    |      | 3.0298  |           |           | 0.9466054 |           |           |           |
|           |                    |      | 3.2739  |           |           | 1.02287   |           |           |           |
|           |                    |      | 2.6959  | 2.7752    | 0.2260894 | 0.8422845 | 0.8670603 | 0.0706375 | 0.0075727 |
| Isoform 2 | 50uM Cisplatin     |      | 3.2002  |           |           | 0.9598438 |           |           |           |
|           |                    |      | 2.3633  |           |           | 0.7383697 |           |           |           |
|           |                    |      | 2.6228  |           |           | 0.8194457 |           |           |           |
|           |                    |      | 3.4188  |           |           | 1.0681413 |           |           |           |
|           |                    |      | 2.8067  | 2.7145    | 0.1139156 | 0.8775268 | 0.8480957 | 0.0355908 | 0.000661  |
| Isoform 2 | 25uM Etoposide     |      | 3.2002  |           |           | 0.9598438 |           |           |           |
|           |                    |      | 2.5804  |           |           | 0.8061986 |           |           |           |
|           |                    |      | 2.4814  |           |           | 0.7752679 |           |           |           |
|           |                    |      | 2.9875  |           |           | 0.9333896 |           |           |           |
|           |                    |      | 1.1729  | 1.180075  | 0.0091984 | 0.3664511 | 0.3686928 | 0.0028739 | 0.0007298 |
| Isoform 2 | 100uM Etoposide    |      | 3.2002  |           |           | 0.9598438 |           |           |           |
|           |                    |      | 1.1579  |           |           | 0.3611646 |           |           |           |
|           |                    |      | 1.1902  |           |           | 0.3718562 |           |           |           |
|           |                    |      | 1.1993  |           |           | 0.3746993 |           |           |           |
|           |                    |      | 1.3922  | 0.9706    | 0.143051  | 0.4349674 | 0.3032462 | 0.0446937 | 0.0144627 |
| Isoform 2 | 0.25uM Doxorubicin |      | 3.2002  |           |           | 0.9598438 |           |           |           |
|           |                    |      | 0.8132  |           |           | 0.2540694 |           |           |           |
|           |                    |      | 0.7747  |           |           | 0.2420408 |           |           |           |
|           |                    |      | 0.9023  |           |           | 0.2819071 |           |           |           |
|           |                    |      | 0.9089  | 1.0055    | 0.033819  | 0.2839691 | 0.31415   | 0.0105661 | 0.0001675 |
| Isoform 2 | 0.5uM Doxorubicin  |      | 3.2002  |           |           | 0.9598438 |           |           |           |
|           |                    |      | 1.0185  |           |           | 0.3182116 |           |           |           |
|           |                    |      | 1.0664  |           |           | 0.3331771 |           |           |           |
|           |                    |      | 1.0282  |           |           | 0.3212422 |           |           |           |
|           |                    |      | 0.6981  | 0.70205   | 0.0044873 | 0.2181085 | 0.2193426 | 0.001402  | 0.0039776 |
| Isoform 2 | 1uM Doxorubicin    |      | 3.2002  |           |           | 0.9598438 |           |           |           |
|           |                    |      | 0.6955  |           |           | 0.2172962 |           |           |           |
|           |                    |      | 0.7153  |           |           | 0.2294824 |           |           |           |
|           |                    |      | 0.6993  |           |           | 0.2184835 |           |           |           |
|           |                    |      | 0.5675  | 0.6532    | 0.0633951 | 0.177305  | 0.204804  | 0.0198066 | 0.0020921 |
|           | 0.5936             |      |         | 0.1729622 |           |           |           |           |           |
|           | 0.6628             |      |         | 0.2070797 |           |           |           |           |           |
|           | 0.8289             |      |         | 0.2589746 |           |           |           |           |           |
| Genotype  | Treatment          | A540 | Average | SEM       | Relative  | Average   | SEM       | ttest     |           |
| Control   | Control            |      | 2.6407  | 2.2215667 | 0.2159264 | 1.1886657 | 1         | 0.0971955 |           |
| Control   | 75uM Cisplatin     |      | 2.6407  |           |           | 1.1886657 |           |           |           |
|           |                    |      | 1.9219  |           |           | 0.8651102 |           |           |           |
|           |                    |      | 2.1021  |           |           | 0.9462241 |           |           |           |
|           |                    |      | 2.6412  | 2.471875  | 0.0760526 | 1.1886907 | 1.112672  | 0.0342338 |           |
|           |                    |      | 2.2884  |           |           | 1.0303839 |           |           |           |
| Control   | 100uM Cisplatin    |      | 2.6407  |           |           | 1.1886657 |           |           |           |
|           |                    |      | 2.4199  |           |           | 1.0892763 |           |           |           |
|           |                    |      | 2.538   |           |           | 1.142437  |           |           |           |
|           |                    |      | 2.7274  | 2.43845   | 0.1300682 | 1.2276922 | 1.0976263 | 0.0585479 |           |
|           |                    |      | 2.525   |           |           | 1.1365853 |           |           |           |
| Control   | 50uM Etoposide     |      | 2.6407  |           |           | 1.1886657 |           |           |           |
|           |                    |      | 2.3948  |           |           | 1.077978  |           |           |           |
|           |                    |      | 2.1066  |           |           | 0.9482497 |           |           |           |
|           |                    |      | 0.9228  | 0.821725  | 0.0607193 | 0.4153825 | 0.3698854 | 0.0273318 |           |
|           |                    |      | 0.8793  |           |           | 0.3958018 |           |           |           |
| Control   | 75uM Etoposide     |      | 2.6407  |           |           | 1.1886657 |           |           |           |
|           |                    |      | 0.8376  |           |           | 0.3770312 |           |           |           |
|           |                    |      | 0.6472  |           |           | 0.2913259 |           |           |           |
|           |                    |      | 0.636   | 0.71165   | 0.039019  | 0.2862845 | 0.320337  | 0.0152603 |           |
|           |                    |      | 0.7493  |           |           | 0.3372845 |           |           |           |
| Control   | 150uM Etoposide    |      | 2.6407  |           |           | 1.1886657 |           |           |           |
|           |                    |      | 0.6762  |           |           | 0.3043798 |           |           |           |
|           |                    |      | 0.7851  |           |           | 0.3533993 |           |           |           |
|           |                    |      | 0.6972  | 0.679275  | 0.0379616 | 0.3183326 | 0.305764  | 0.0170878 |           |
|           |                    |      | 0.7286  |           |           | 0.3279668 |           |           |           |
| Control   | 0.75uM Doxorubicin |      | 2.6407  |           |           | 1.1886657 |           |           |           |
|           |                    |      | 0.5673  |           |           | 0.2553603 |           |           |           |
|           |                    |      | 0.1582  | 0.3237    | 0.0552837 | 0.071211  | 0.145708  | 0.024885  |           |
|           |                    |      | 0.3689  |           |           | 0.166054  |           |           |           |
|           |                    |      | 0.3821  |           |           | 0.1719957 |           |           |           |
| Control   | 2uM Doxorubicin    |      | 2.6407  |           |           | 1.1886657 |           |           |           |
|           |                    |      | 0.3856  |           |           | 0.1735712 |           |           |           |
|           |                    |      | 0.676   | 0.572625  | 0.0404821 | 0.3042898 | 0.2577573 | 0.0182223 |           |
|           |                    |      | 0.5979  |           |           | 0.2691344 |           |           |           |
|           |                    |      | 0.5026  |           |           | 0.2262367 |           |           |           |
|           | 0.514              |      |         | 0.2319683 |           |           |           |           |           |
| Genotype  | Treatment          | A540 | Average | SEM       | Relative  | Average   | SEM       | ttest     |           |
| Isoform 1 | Control            |      | 2.667   | 2.673525  | 0.0750858 | 0.9245439 | 1         | 0.0261302 |           |
| Isoform 1 | 75uM Cisplatin     |      | 2.667   |           |           | 0.9245439 |           |           |           |
|           |                    |      | 2.8914  |           |           | 1.0062206 |           |           |           |
|           |                    |      | 2.9893  |           |           | 1.0402902 |           |           |           |
|           |                    |      | 2.9677  |           |           | 1.0289453 |           |           |           |
|           |                    |      | 2.3771  | 2.44125   | 0.113466  | 0.795214  | 0.8495663 | 0.0387491 | 0.0011742 |
| Isoform 1 | 100uM Cisplatin    |      | 2.667   |           |           | 0.9245439 |           |           |           |
|           |                    |      | 2.5355  |           |           | 0.882865  |           |           |           |
|           |                    |      | 2.2321  |           |           | 0.7767811 |           |           |           |

## S4 Table – cont.

### Experiment 2

| Genotype        | Treatment          | A540        | Average        | SEM        | Relative        | Average        | SEM        | ttest        |
|-----------------|--------------------|-------------|----------------|------------|-----------------|----------------|------------|--------------|
| Control         | Control            | 3.8911      | 2.9365         | 0.3246975  | 1.3250809       | 1              | 0.110573   |              |
|                 |                    | 2.4357      |                |            | 0.8294568       |                |            |              |
|                 |                    | 2.7171      |                |            | 0.9252852       |                |            |              |
|                 |                    | 2.7021      |                |            | 0.9201771       |                |            |              |
| Control         | 25uM Cisplatin     | 2.7189      | 2.7824333      | 0.0786395  | 0.9258982       | 0.9475339      | 0.02678    |              |
|                 |                    | 2.6896      |                |            | 0.9159203       |                |            |              |
|                 |                    | 2.9388      |                |            | 1.0007832       |                |            |              |
| Control         | 50uM Cisplatin     | 3.0213      | 2.741775       | 0.1092953  | 1.0288779       | 0.9336881      | 0.0372196  |              |
|                 |                    | 2.6652      |                |            | 0.9076111       |                |            |              |
|                 |                    | 2.7795      |                |            | 0.946535        |                |            |              |
|                 |                    | 2.5011      |                |            | 0.8517282       |                |            |              |
| Control         | 25uM Etoposide     | 1.3766      | 1.2145         | 0.0737554  | 0.4687894       | 0.4135876      | 0.0251168  |              |
|                 |                    | 1.1441      |                |            | 0.3896135       |                |            |              |
|                 |                    | 1.2908      |                |            | 0.4395709       |                |            |              |
|                 |                    | 1.0465      |                |            | 0.3563786       |                |            |              |
| Control         | 100uM Etoposide    | 0.8786      | 1.16775        | 0.1421819  | 0.2291997       | 0.3976673      | 0.0484188  |              |
|                 |                    | 1.4253      |                |            | 0.4853737       |                |            |              |
|                 |                    | 1.3982      |                |            | 0.4761451       |                |            |              |
|                 |                    | 0.9689      |                |            | 0.3299506       |                |            |              |
| Control         | 0.25uM Doxorubicin | 0.7743      | 0.704525       | 0.0376962  | 0.2636813       | 0.23992        | 0.0128371  |              |
|                 |                    | 0.6424      |                |            | 0.2187638       |                |            |              |
|                 |                    | 0.7651      |                |            | 0.2605483       |                |            |              |
|                 |                    | 0.6363      |                |            | 0.2168885       |                |            |              |
| Control         | 0.5uM Doxorubicin  | 0.5627      | 0.471475       | 0.0336665  | 0.1916227       | 0.1605568      | 0.0114648  |              |
|                 |                    | 0.4004      |                |            | 0.1363528       |                |            |              |
|                 |                    | 0.4579      |                |            | 0.1559339       |                |            |              |
|                 |                    | 0.4649      |                |            | 0.1583177       |                |            |              |
| Control         | 1uM Doxorubicin    | 0.5265      | 0.570375       | 0.0234244  | 0.1792951       | 0.1942363      | 0.007977   |              |
|                 |                    | 0.5612      |                |            | 0.1911119       |                |            |              |
|                 |                    | 0.5571      |                |            | 0.1897156       |                |            |              |
|                 |                    | 0.6367      |                |            | 0.2168227       |                |            |              |
| <b>Genotype</b> | <b>Treatment</b>   | <b>A540</b> | <b>Average</b> | <b>SEM</b> | <b>Relative</b> | <b>Average</b> | <b>SEM</b> | <b>ttest</b> |
| Isoform 1       | Control            | 2.6271      | 2.900025       | 0.3102741  | 0.9058887       | 1              | 0.1069901  |              |
|                 |                    | 2.5916      |                |            | 0.8936475       |                |            |              |
|                 |                    | 3.8297      |                |            | 1.3205748       |                |            |              |
|                 |                    | 2.5517      |                |            | 0.879889        |                |            |              |
| Isoform 1       | 25uM Cisplatin     | 3.0748      | 3.105          | 0.1417773  | 1.0602667       | 1.0706804      | 0.0488883  | 0.0423151    |
|                 |                    | 3.1079      |                |            | 1.0716804       |                |            |              |
|                 |                    | 2.7723      |                |            | 0.9559573       |                |            |              |
|                 |                    | 3.465       |                |            | 1.1948173       |                |            |              |
| Isoform 1       | 50uM Cisplatin     | 2.7739      | 2.647075       | 0.0912483  | 0.956509        | 0.9127766      | 0.0314647  | 0.3416278    |
|                 |                    | 2.7666      |                |            | 0.9539918       |                |            |              |
|                 |                    | 2.3839      |                |            | 0.8220274       |                |            |              |
|                 |                    | 2.6639      |                |            | 0.9185783       |                |            |              |
| Isoform 1       | 25uM Etoposide     | 1.0746      | 1.086775       | 0.0349603  | 0.3705485       | 0.3747468      | 0.0120552  | 0.1154109    |
|                 |                    | 0.9884      |                |            | 0.3442729       |                |            |              |
|                 |                    | 1.1658      |                |            | 0.4019965       |                |            |              |
|                 |                    | 1.1083      |                |            | 0.3821691       |                |            |              |
| Isoform 1       | 100uM Etoposide    | 0.9747      | 1.078475       | 0.1487895  | 0.3361006       | 0.3718847      | 0.0513063  | 0.3636689    |
|                 |                    | 0.873       |                |            | 0.3010319       |                |            |              |
|                 |                    | 1.5202      |                |            | 0.5242024       |                |            |              |
|                 |                    | 0.946       |                |            | 0.3262041       |                |            |              |
| Isoform 1       | 0.25uM Doxorubicin | 0.753       | 0.677325       | 0.0391733  | 0.2596529       | 0.2335583      | 0.0135079  | 0.3722405    |
|                 |                    | 0.5795      |                |            | 0.1998259       |                |            |              |
|                 |                    | 0.6505      |                |            | 0.2243084       |                |            |              |
|                 |                    | 0.7263      |                |            | 0.2504461       |                |            |              |
| Isoform 1       | 0.5uM Doxorubicin  | 0.5184      | 0.502425       | 0.0106366  | 0.1787571       | 0.1732485      | 0.0036678  | 0.1785706    |
|                 |                    | 0.4898      |                |            | 0.1688951       |                |            |              |
|                 |                    | 0.5224      |                |            | 0.1801364       |                |            |              |
|                 |                    | 0.4791      |                |            | 0.1652055       |                |            |              |
| Isoform 1       | 1uM Doxorubicin    | 0.5317      | 0.52455        | 0.014127   | 0.1833432       | 0.1808778      | 0.0048713  | 0.1063629    |
|                 |                    | 0.4955      |                |            | 0.1708606       |                |            |              |
|                 |                    | 0.5104      |                |            | 0.1759985       |                |            |              |
|                 |                    | 0.5606      |                |            | 0.1933087       |                |            |              |
| <b>Genotype</b> | <b>Treatment</b>   | <b>A540</b> | <b>Average</b> | <b>SEM</b> | <b>Relative</b> | <b>Average</b> | <b>SEM</b> | <b>ttest</b> |
| Isoform 2       | Control            | 3.5703      | 2.848275       | 0.3680011  | 1.2534955       | 1              | 0.1292014  |              |
|                 |                    | 2.1588      |                |            | 0.7579324       |                |            |              |
|                 |                    | 3.3923      |                |            | 1.1910016       |                |            |              |
|                 |                    | 2.2717      |                |            | 0.7375705       |                |            |              |
| Isoform 2       | 25uM Cisplatin     | 2.7819      | 3.06755        | 0.2208958  | 0.9768964       | 1.0769852      | 0.0775542  | 0.0979328    |
|                 |                    | 2.9061      |                |            | 1.0203018       |                |            |              |
|                 |                    | 3.7258      |                |            | 1.30809         |                |            |              |
|                 |                    | 2.8564      |                |            | 1.0028526       |                |            |              |
| Isoform 2       | 50uM Cisplatin     | 3.1651      | 2.6998         | 0.1747103  | 1.111234        | 0.947872       | 0.061339   | 0.4255778    |
|                 |                    | 2.3626      |                |            | 0.8294845       |                |            |              |
|                 |                    | 2.7538      |                |            | 0.9668308       |                |            |              |
|                 |                    | 2.5177      |                |            | 0.8839385       |                |            |              |
| Isoform 2       | 25uM Etoposide     | 0.9839      | 0.97805        | 0.0582098  | 0.3454372       | 0.3433833      | 0.0204369  | 0.0375646    |
|                 |                    | 1.0661      |                |            | 0.3742967       |                |            |              |
|                 |                    | 1.0504      |                |            | 0.3687846       |                |            |              |
|                 |                    | 0.8118      |                |            | 0.2850146       |                |            |              |
| Isoform 2       | 100uM Etoposide    | 0.7853      | 0.91955        | 0.114395   | 0.2757107       | 0.3228445      | 0.0401629  | 0.1403357    |
|                 |                    | 0.8317      |                |            | 0.2920013       |                |            |              |
|                 |                    | 1.2615      |                |            | 0.4428996       |                |            |              |
|                 |                    | 0.7997      |                |            | 0.2807664       |                |            |              |
| Isoform 2       | 0.25uM Doxorubicin | 0.5834      | 0.5778         | 0.0100186  | 0.1978039       | 0.2028596      | 0.0035174  | 0.0293383    |
|                 |                    | 0.5859      |                |            | 0.2057035       |                |            |              |
|                 |                    | 0.6023      |                |            | 0.2114613       |                |            |              |
|                 |                    | 0.5596      |                |            | 0.1964698       |                |            |              |
| Isoform 2       | 0.5uM Doxorubicin  | 0.4639      | 0.444975       | 0.0100316  | 0.1628705       | 0.1562261      | 0.003522   | 0.369212     |
|                 |                    | 0.4193      |                |            | 0.1472119       |                |            |              |
|                 |                    | 0.4575      |                |            | 0.1606235       |                |            |              |
|                 |                    | 0.4992      |                |            | 0.1541986       |                |            |              |
| Isoform 2       | 1uM Doxorubicin    | 0.4481      | 0.5013         | 0.0198259  | 0.1573233       | 0.1760013      | 0.0069607  | 0.0683393    |
|                 |                    | 0.494       |                |            | 0.1734383       |                |            |              |
|                 |                    | 0.5328      |                |            | 0.1870606       |                |            |              |
|                 |                    | 0.5303      |                |            | 0.1861829       |                |            |              |

# S4 Table – cont.

## Experiment 3

| Genotype  | Treatment          | A540   | Average   | SEM       | Relative  | Average   | SEM       |           |
|-----------|--------------------|--------|-----------|-----------|-----------|-----------|-----------|-----------|
| Control   | Control            | 2.9747 | 2.786125  | 0.1185097 | 1.0676836 | 1         | 0.0425357 |           |
|           |                    | 2.4876 |           |           | 0.862853  |           |           |           |
|           |                    | 2.9786 |           |           | 1.0690834 |           |           |           |
|           |                    | 2.7036 |           |           | 0.97038   |           |           |           |
| Control   | 25uM Cisplatin     | 3.035  | 2.7741333 | 0.132775  | 1.0893266 | 0.9956959 | 0.0476558 |           |
|           |                    | 2.6007 |           |           | 0.933447  |           |           |           |
|           |                    | 2.6867 |           |           | 0.9643142 |           |           |           |
| Control   | 50uM Cisplatin     | 2.5966 | 2.619275  | 0.144703  | 0.9319754 | 0.940114  | 0.051937  |           |
|           |                    | 2.9877 |           |           | 1.0723496 |           |           |           |
|           |                    | 2.6126 |           |           | 0.9377182 |           |           |           |
|           |                    | 2.2802 |           |           | 0.8184127 |           |           |           |
| Control   | 25uM Etoposide     | 1.2813 | 1.2289    | 0.0198408 | 0.459886  | 0.4410786 | 0.0071213 |           |
|           |                    | 1.2347 |           |           | 0.431803  |           |           |           |
|           |                    | 1.211  |           |           | 0.4346539 |           |           |           |
|           |                    | 1.1886 |           |           | 0.426614  |           |           |           |
| Control   | 100uM Etoposide    | 1.0474 | 1.044675  | 0.0334957 | 0.3759343 | 0.3749563 | 0.0120223 |           |
|           |                    | 0.9698 |           |           | 0.3888094 |           |           |           |
|           |                    | 1.0675 |           |           | 0.3831486 |           |           |           |
|           |                    | 0.9525 |           |           | 0.3418727 |           |           |           |
| Control   | 0.25uM Doxorubicin | 0.9577 | 0.9305    | 0.0224168 | 0.3437391 | 0.3339764 | 0.0080459 |           |
|           |                    | 0.9289 |           |           | 0.3334021 |           |           |           |
|           |                    | 0.8679 |           |           | 0.3115079 |           |           |           |
|           |                    | 0.9675 |           |           | 0.3472565 |           |           |           |
| Control   | 0.5uM Doxorubicin  | 0.7468 | 0.69775   | 0.0247671 | 0.2690425 | 0.2504374 | 0.0088894 |           |
|           |                    | 0.734  |           |           | 0.2634483 |           |           |           |
|           |                    | 0.6563 |           |           | 0.2355601 |           |           |           |
|           |                    | 0.6539 |           |           | 0.2346987 |           |           |           |
| Control   | 1uM Doxorubicin    | 0.6988 | 0.7689    | 0.0710804 | 0.3480892 | 0.2759747 | 0.0255123 |           |
|           |                    | 0.7692 |           |           | 0.276924  |           |           |           |
|           |                    | 0.6646 |           |           | 0.2385392 |           |           |           |
|           |                    | 0.672  |           |           | 0.2411952 |           |           |           |
| Genotype  | Treatment          | A540   | Average   | SEM       | Relative  | Average   | SEM       | ttest     |
| Isoform 1 | Control            | 2.8579 | 2.707625  | 0.0530336 | 1.0555007 | 1         | 0.0195868 |           |
|           |                    | 2.6662 |           |           | 0.9847006 |           |           |           |
|           |                    | 2.6952 |           |           | 0.9954111 |           |           |           |
|           |                    | 2.6112 |           |           | 0.9643876 |           |           |           |
| Isoform 1 | 25uM Cisplatin     | 2.8969 | 2.627525  | 0.124143  | 1.0699044 | 0.9704169 | 0.0458494 | 0.3594351 |
|           |                    | 2.6818 |           |           | 0.9904621 |           |           |           |
|           |                    | 2.6346 |           |           | 0.9730299 |           |           |           |
|           |                    | 2.2988 |           |           | 0.8482711 |           |           |           |
| Isoform 1 | 50uM Cisplatin     | 2.3776 | 2.3856    | 0.0422563 | 0.8781127 | 0.8810674 | 0.0156064 | 0.1723999 |
|           |                    | 2.462  |           |           | 0.909284  |           |           |           |
|           |                    | 2.2702 |           |           | 0.838447  |           |           |           |
|           |                    | 2.4326 |           |           | 0.8884257 |           |           |           |
| Isoform 1 | 25uM Etoposide     | 1.0081 | 1.013725  | 0.0030587 | 0.3723189 | 0.3743964 | 0.0011297 | 0.0010943 |
|           |                    | 1.0224 |           |           | 0.3776003 |           |           |           |
|           |                    | 1.0116 |           |           | 0.3736116 |           |           |           |
|           |                    | 1.0128 |           |           | 0.3740548 |           |           |           |
| Isoform 1 | 100uM Etoposide    | 0.9885 | 0.94255   | 0.0260968 | 0.3650801 | 0.3481095 | 0.0096382 | 0.0672139 |
|           |                    | 0.8804 |           |           | 0.3251558 |           |           |           |
|           |                    | 0.9185 |           |           | 0.3392272 |           |           |           |
|           |                    | 0.9828 |           |           | 0.3629749 |           |           |           |
| Isoform 1 | 0.25uM Doxorubicin | 0.9024 | 0.90805   | 0.0180178 | 0.333281  | 0.3353677 | 0.0066545 | 0.4492497 |
|           |                    | 0.9395 |           |           | 0.3469831 |           |           |           |
|           |                    | 0.8595 |           |           | 0.3174369 |           |           |           |
|           |                    | 0.9308 |           |           | 0.3437699 |           |           |           |
| Isoform 1 | 0.5uM Doxorubicin  | 0.6851 | 0.662175  | 0.014669  | 0.2530262 | 0.2445593 | 0.0054177 | 0.2984505 |
|           |                    | 0.6869 |           |           | 0.253691  |           |           |           |
|           |                    | 0.6259 |           |           | 0.231162  |           |           |           |
|           |                    | 0.6508 |           |           | 0.2403582 |           |           |           |
| Isoform 1 | 1uM Doxorubicin    | 0.6538 | 0.686075  | 0.0310801 | 0.2414662 | 0.2533863 | 0.0114787 | 0.2314956 |
|           |                    | 0.6547 |           |           | 0.2417986 |           |           |           |
|           |                    | 0.6565 |           |           | 0.2424634 |           |           |           |
|           |                    | 0.7793 |           |           | 0.2878168 |           |           |           |
| Genotype  | Treatment          | A540   | Average   | SEM       | Relative  | Average   | SEM       | ttest     |
| Isoform 2 | Control            | 2.6776 | 2.2919    | 0.1391063 | 1.1652893 | 1         | 0.0606947 |           |
|           |                    | 2.294  |           |           | 1.0009163 |           |           |           |
|           |                    | 2.1622 |           |           | 0.9434094 |           |           |           |
|           |                    | 2.0338 |           |           | 0.887386  |           |           |           |
| Isoform 2 | 25uM Cisplatin     | 2.2009 | 2.125975  | 0.1068774 | 0.9602095 | 0.9276037 | 0.0466327 | 0.1781208 |
|           |                    | 2.0328 |           |           | 0.8884997 |           |           |           |
|           |                    | 1.8875 |           |           | 0.8235525 |           |           |           |
|           |                    | 2.3827 |           |           | 1.0396178 |           |           |           |
| Isoform 2 | 50uM Cisplatin     | 2.3431 | 2.136575  | 0.1027358 | 1.0223305 | 0.9322287 | 0.0448256 | 0.4561621 |
|           |                    | 2.2829 |           |           | 0.9607031 |           |           |           |
|           |                    | 1.9732 |           |           | 0.8609451 |           |           |           |
|           |                    | 1.9471 |           |           | 0.8495571 |           |           |           |
| Isoform 2 | 25uM Etoposide     | 1.2348 | 1.016875  | 0.0958929 | 0.5388767 | 0.4436821 | 0.0418399 | 0.477373  |
|           |                    | 1.1211 |           |           | 0.4891575 |           |           |           |
|           |                    | 0.8487 |           |           | 0.3703041 |           |           |           |
|           |                    | 0.8629 |           |           | 0.3764998 |           |           |           |
| Isoform 2 | 100uM Etoposide    | 1.0148 | 0.946875  | 0.0351713 | 0.4427767 | 0.4131398 | 0.0153459 | 0.0503134 |
|           |                    | 0.882  |           |           | 0.3848335 |           |           |           |
|           |                    | 0.8905 |           |           | 0.3885423 |           |           |           |
|           |                    | 1.0002 |           |           | 0.4364065 |           |           |           |
| Isoform 2 | 0.25uM Doxorubicin | 0.9521 | 0.80485   | 0.0531141 | 0.4154105 | 0.3511715 | 0.0231747 | 0.2823852 |
|           |                    | 0.7997 |           |           | 0.3489245 |           |           |           |
|           |                    | 0.7658 |           |           | 0.3341333 |           |           |           |
|           |                    | 0.7018 |           |           | 0.3062088 |           |           |           |
| Isoform 2 | 0.5uM Doxorubicin  | 0.6202 | 0.565825  | 0.0421588 | 0.2786552 | 0.2468803 | 0.0183947 | 0.4346104 |
|           |                    | 0.6303 |           |           | 0.275012  |           |           |           |
|           |                    | 0.5662 |           |           | 0.2470439 |           |           |           |
|           |                    | 0.4466 |           |           | 0.1948602 |           |           |           |
| Isoform 2 | 1uM Doxorubicin    | 0.5299 | 0.518025  | 0.0086185 | 0.2312055 | 0.2260243 | 0.0037604 | 0.072158  |
|           |                    | 0.533  |           |           | 0.2325581 |           |           |           |
|           |                    | 0.4955 |           |           | 0.2161962 |           |           |           |
|           |                    | 0.5137 |           |           | 0.2241372 |           |           |           |

| Genotype  | Treatment       | A540   | Average  | SEM       | Relative  | Average   | SEM       |           |
|-----------|-----------------|--------|----------|-----------|-----------|-----------|-----------|-----------|
| Control   | Control         | 3.0919 | 2.78305  | 0.1259683 | 1.1109754 | 1         | 0.0452627 |           |
|           |                 | 2.8852 |          |           | 1.0367043 |           |           |           |
|           |                 | 2.5694 |          |           | 0.9232317 |           |           |           |
|           |                 | 2.5857 |          |           | 0.9290886 |           |           |           |
| Control   | 75uM Cisplatin  | 2.6588 | 2.4978   | 0.0823666 | 0.9553547 | 0.8975045 | 0.0295958 |           |
|           |                 | 2.4475 |          |           | 0.8794308 |           |           |           |
|           |                 | 2.3871 |          |           | 0.857728  |           |           |           |
| Control   | 100uM Cisplatin | 2.8826 | 2.514875 | 0.0714429 | 0.9639065 | 0.9036399 | 0.0256707 |           |
|           |                 | 2.5408 |          |           | 0.9129552 |           |           |           |
|           |                 | 2.5008 |          |           | 0.8985825 |           |           |           |
|           |                 | 2.3353 |          |           | 0.8391154 |           |           |           |
| Control   | 50uM Etoposide  | 1.1259 | 1.1125   | 0.019191  | 0.4045562 | 0.3997413 | 0.0068957 |           |
|           |                 | 1.083  |          |           | 0.3891414 |           |           |           |
|           |                 | 1.1608 |          |           | 0.4170964 |           |           |           |
|           |                 | 1.0803 |          |           | 0.3881713 |           |           |           |
| Control   | 75uM Etoposide  | 1.0035 | 1.0441   | 0.0370993 | 0.3605756 | 0.3751639 | 0.0133305 |           |
|           |                 | 1.0459 |          |           | 0.3758107 |           |           |           |
|           |                 | 0.9795 |          |           | 0.351952  |           |           |           |
|           |                 | 1.1475 |          |           | 0.4123174 |           |           |           |
| Control   | 150uM Etoposide | 1.032  | 1.024625 | 0.0055479 | 0.3708162 | 0.3681662 | 0.0019935 |           |
|           |                 | 1.0081 |          |           | 0.3622285 |           |           |           |
|           |                 | 1.0291 |          |           | 0.3697742 |           |           |           |
|           |                 | 1.0293 |          |           | 0.369846  |           |           |           |
| Control   | 2uM Doxorubicin | 0.685  | 0.70845  | 0.0152684 | 0.2461328 | 0.2545588 | 0.0054862 |           |
|           |                 | 0.7272 |          |           | 0.2612961 |           |           |           |
|           |                 | 0.7415 |          |           | 0.2664343 |           |           |           |
|           |                 | 0.6801 |          |           | 0.2443722 |           |           |           |
| Genotype  | Treatment       | A540   | Average  | SEM       | Relative  | Average   | SEM       | ttest     |
| Isoform 1 | Control         | 2.6811 | 2.785525 | 0.1049882 | 0.9825116 | 1         | 0.0376906 |           |
|           |                 | 2.7875 |          |           | 1.000709  |           |           |           |
|           |                 | 2.5958 |          |           | 0.931689  |           |           |           |
|           |                 | 3.0777 |          |           | 1.1048905 |           |           |           |
| Isoform 1 | 25uM Cisplatin  | 2.5932 | 2.48865  | 0.0586232 | 0.9309556 | 0.8934222 | 0.0210456 | 0.4580402 |
|           |                 | 2.5847 |          |           | 0.9279041 |           |           |           |
|           |                 | 2.3664 |          |           | 0.8495346 |           |           |           |
|           |                 | 2.4103 |          |           | 0.8652947 |           |           |           |
| Isoform 1 | 100uM Cisplatin | 2.5439 | 2.255525 | 0.1087323 | 0.9132569 | 0.8097307 | 0.0390348 | 0.0492984 |
|           |                 | 2.1014 |          |           | 0.7544    |           |           |           |
|           |                 | 2.3023 |          |           | 0.8265228 |           |           |           |
|           |                 | 2.0745 |          |           | 0.7447429 |           |           |           |
| Isoform 1 | 50uM Etoposide  | 0.8861 | 0.920275 | 0.0295492 | 0.3181088 | 0.3303776 | 0.0106081 | 0.0012546 |
|           |                 | 1.0045 |          |           | 0.3606142 |           |           |           |
|           |                 | 0.9172 |          |           | 0.3292737 |           |           |           |
|           |                 | 0.8733 |          |           | 0.3135136 |           |           |           |
| Isoform 1 | 75uM Etoposide  | 0.9192 | 0.960425 | 0.0346057 | 0.3299917 | 0.3447914 | 0.0124234 | 0.0734233 |
|           |                 | 1.0193 |          |           | 0.3300276 |           |           |           |
|           |                 | 0.94   |          |           | 0.3374588 |           |           |           |
|           |                 | 0.9632 |          |           | 0.3816875 |           |           |           |
| Isoform 1 | 150uM Etoposide | 0.8505 | 0.872325 | 0.0396671 | 0.3053284 | 0.3131636 | 0.0142404 | 0.0146983 |
