# Supplementary material for: WDR23 regulates NRF2 independently of KEAP1
Source: PubMed Central journal article supplement (PMC5428976; doi:10.1371/journal.pgen.1006762), 2017-04-28
Supplement: pgen.1006762.s016.pdf [file pgen.1006762.s016.pdf]

**S5 Table. COSMIC Database analysis of WDR23 mutations and expression in somatic tumors**

| Tissue                    | Point mutations ID/Tested | Copy variation ID/Tested              | number                                 | Expression ID/Tested |
|---------------------------|---------------------------|---------------------------------------|----------------------------------------|----------------------|
| Adrenal gland             | n.d.                      | 1/72 increased<br>n.d.                | 5/79 increased<br>n.d.                 |                      |
| Bone                      | 2/496                     | n.d.<br>n.d.                          | n.d.<br>n.d.                           |                      |
| Breast                    | 6/1350                    | 8/987 increased<br>1/987 decreased    | 59/1092 increased<br>46/1092 decreased |                      |
| CNS                       | 1/2128                    | 1/805 increased<br>n.d.               | 25/662 increased<br>59/662 decreased   |                      |
| Cervix                    | 1/320                     | 1/174 increased<br>n.d.               | 20/305 increased<br>n.d.               |                      |
| Endometrium               | 7/631                     | 2/421 increased<br>n.d.               | 40/593 increased<br>11/593 decreased   |                      |
| Lymphoid                  | 1/2139                    | n.d.<br>n.d.                          | 12/216 increased<br>2/216 decreased    |                      |
| Kidney                    | 7/1474                    | n.d.<br>n.d..                         | 17/595 increased<br>13/595 decreased   |                      |
| Large Intestine           | 18/1356                   | 3/699 decreased<br>n.d.               | 20/602 increased<br>22/602 decreased   |                      |
| Liver                     | 6/1611                    | n.d.<br>n.d.                          | 24/359 increased<br>n.d.               |                      |
| Lung                      | 8/1823                    | 10/1102 increased<br>3/1102 decreased | 57/1008 increased<br>30/1008 decreased |                      |
| Oesophagus                | 4/791                     | 3/108 increased<br>n.d.               | 4/125 increased<br>1/125 decreased     |                      |
| Ovary                     | 2/831                     | 2/721 increased<br>1/721 decreased    | 19/266 increased<br>38/266 decreased   |                      |
| Pancreas                  | 2/1521                    | n.d.<br>n.d.                          | 7/168 increased<br>2/168 decreased     |                      |
| Prostate                  | 1/1019                    | n.d.<br>n.d.                          | 16/491 increased<br>20/491 decreased   |                      |
| Skin                      | 24/983                    | 1/482 decreased<br>n.d.               | 20/467 increased<br>10/467 decreased   |                      |
| Soft tissue               | n.d.                      | 3/139 increased<br>n.d.               | 15/215 increased<br>7/215 decreased    |                      |
| Stomach                   | 10/587                    | 1/348 increased<br>n.d.               | 11/285 increased<br>4/285 decreased    |                      |
| Thyroid                   | 1/567                     | n.d.<br>n.d.                          | 15/512 increased<br>6/512 decreased    |                      |
| Upper aerodigestive tract | n.d.                      | 4/467 increased<br>n.d.               | 19/517 increased<br>n.d.               |                      |
| Urinary tract             | 2/652                     | 2/225 increased<br>n.d.               | 22/393 increased<br>8/393 decreased    |                      |
