# Supplementary material for: WDR23 regulates NRF2 independently of KEAP1
Source: PubMed Central journal article supplement (PMC5428976; doi:10.1371/journal.pgen.1006762), 2017-04-28
Supplement: pgen.1006762.s017.pdf [file pgen.1006762.s017.pdf]

**S6 Table. qPCR primer sequences**

| Target Gene               | Forward Sequence       | Reverse Sequence       |
|---------------------------|------------------------|------------------------|
| <i>Human Targets</i>      |                        |                        |
| <i>B2M</i>                | AATGTCGGATGGATGAAACC   | TCTCTCTTTCTGGCCTGGAG   |
| <i>ABCC1</i>              | GTTTCTCAGATCGCTCACCC   | TCCACCAGAAGGTGATCCTC   |
| <i>ACADL</i>              | TAGTATTCATTCAGGTATTGTC | GCTCTGTCATTGCTATTG     |
| <i>ACADM</i>              | CTGGTGCTGTTGGATTAG     | ATATTGCTTGGTGCTCTAC    |
| <i>ACADS</i>              | GATTGTGCTGTGAACTAC     | CAACTTGAAGTGGATGAC     |
| <i>CPT1A1</i>             | AATAAGCAGTCTCTTGATG    | CACTTCTGTATCCTTCTTC    |
| <i>CYP1A1</i>             | CCCAGCTCAGCTCAGTACCT   | GAGGCCAGAAGAACTCCGT    |
| <i>CYP3A4</i>             | TTTTGTCTACCATAAGGGCTTT | CACAGGCTGTTGACCATCAT   |
| <i>CYP4A11</i>            | CTCAAAGCCCTCCAGCAGT    | ACCCATTTCTGAATCCGTTG   |
| <i>GCLC</i>               | CTGGGGAGTGATTTCTGCAT   | AGGAGGGGGCTTAAATCTCA   |
| <i>GCLM</i>               | AATCTTGCCTCCTGCTGTGTGA | TGCGCTTGAATGTCAGGAATGC |
| <i>GSR</i>                | CAAGCTGGGTGGCACTTG     | TTGGAAAGCCATAATCAGCA   |
| <i>GSTA1</i>              | AATTCAGTTGTGAGCCAGG    | CCGTGCATTGAAGTAGTGGA   |
| <i>HO-1</i>               | AGGTCATCCCCTACACACCA   | TGTTGGGGAAGGTGAAGAAG   |
| <i>KEAP1</i>              | CCAACTTCGCTGAGCAGATT   | GCTGATGAGGGTCACCAGTT   |
| <i>NQO1</i>               | GTTGCCTGAAAAATGGGAGA   | AAAAACCACCAGTGCCAGTC   |
| <i>NRF2</i>               | CGGTATGCAACAGGACATTG   | GTTTGGCTTCTGGACTTGGA   |
| <i>SLBP</i>               | ACTTGCCCAGTCAGAGCATC   | CGAGGAGGCAGAGCACC      |
| <i>SLBP</i>               | CAGTCAGAGCATCTGGAACG   | GGAGCCTGGGACGGAAG      |
| <i>WDR23</i>              | TTCTCCCCCATTCATAGCAC   | CAGCTTCTTCACAATGTGGC   |
| <i>C. elegans Targets</i> |                        |                        |
| <i>snb-1</i>              | CCGGATAAGACCATCTTGACG  | GACGACTTCATCAACCTGAGC  |
| <i>gcs-1</i>              | CCAATCGATTCTTTGGAGA    | TCGACAATGTTGAAGCAAGC   |
| <i>gst-4</i>              | GCTGAGCCAATCCGTATCAT   | CCGAATTGTTCTCCATCGAC   |
| <i>ugt-11</i>             | CCGATTTCTGGGACTCTCAA   | GGAATCCCAGGAAGTGTGAC   |
