# Supplementary material for: WDR23 regulates NRF2 independently of KEAP1
Source: PubMed Central journal article supplement (PMC5428976; doi:10.1371/journal.pgen.1006762), 2017-04-28
Supplement: pgen.1006762.s018.pdf [file pgen.1006762.s018.pdf]

S7 Table. qPCR values

| Figure 1E-P   |                            |             |
|---------------|----------------------------|-------------|
| Target        | Sample                     | Fold Change |
| <i>GSTA1</i>  | Control                    | 1.15 ± 0.25 |
| <i>GSTA1</i>  | WDR23 Isoform 1 o/e        | 0.62 ± 0.10 |
| <i>GSTA1</i>  | WDR23 Isoform 2 o/e        | 0.35 ± 0.11 |
| <i>CYP3A4</i> | Control                    | 1.07 ± 0.16 |
| <i>CYP3A4</i> | WDR23 Isoform 1 o/e        | 0.57 ± 0.14 |
| <i>CYP3A4</i> | WDR23 Isoform 2 o/e        | 0.54 ± 0.14 |
| <i>ACADL</i>  | Control                    | 1.00 ± 0.04 |
| <i>ACADL</i>  | WDR23 Isoform 1 o/e        | 0.81 ± 0.04 |
| <i>ACADL</i>  | WDR23 Isoform 2 o/e        | 0.77 ± 0.07 |
| <i>ACADM</i>  | Control                    | 1.02 ± 0.08 |
| <i>ACADM</i>  | WDR23 Isoform 1 o/e        | 1.10 ± 0.05 |
| <i>ACADM</i>  | WDR23 Isoform 2 o/e        | 0.87 ± 0.04 |
| <i>GSR</i>    | Control                    | 1.09 ± 0.19 |
| <i>GSR</i>    | Control + tBHQ             | 1.80 ± 0.25 |
| <i>GSR</i>    | WDR23 Isoform 1 o/e        | 0.94 ± 0.07 |
| <i>GSR</i>    | WDR23 Isoform 1 o/e + tBHQ | 1.14 ± 0.07 |
| <i>GSR</i>    | WDR23 Isoform 2 o/e        | 0.99 ± 0.07 |
| <i>GSR</i>    | WDR23 Isoform 2 o/e + tBHQ | 1.16 ± 0.08 |
| <i>CYP1A1</i> | Control                    | 1.02 ± 0.07 |
| <i>CYP1A1</i> | Control + tBHQ             | 1.28 ± 0.13 |
| <i>CYP1A1</i> | WDR23 Isoform 1 o/e        | 1.07 ± 0.12 |
| <i>CYP1A1</i> | WDR23 Isoform 1 o/e + tBHQ | 1.09 ± 0.11 |
| <i>CYP1A1</i> | WDR23 Isoform 2 o/e        | 0.59 ± 0.09 |
| <i>CYP1A1</i> | WDR23 Isoform 2 o/e + tBHQ | 0.83 ± 0.04 |
| <i>CPT1A1</i> | Control                    | 1.05 ± 0.12 |
| <i>CPT1A1</i> | Control + tBHQ             | 1.40 ± 0.11 |
| <i>CPT1A1</i> | WDR23 Isoform 1 o/e        | 1.06 ± 0.12 |
| <i>CPT1A1</i> | WDR23 Isoform 1 o/e + tBHQ | 0.74 ± 0.04 |
| <i>CPT1A1</i> | WDR23 Isoform 2 o/e        | 1.04 ± 0.13 |
| <i>CPT1A1</i> | WDR23 Isoform 2 o/e + tBHQ | 0.47 ± 0.05 |
| <i>ACADS</i>  | Control                    | 1.10 ± 0.15 |
| <i>ACADS</i>  | Control + tBHQ             | 1.64 ± 0.15 |
| <i>ACADS</i>  | WDR23 Isoform 1 o/e        | 1.05 ± 0.12 |
| <i>ACADS</i>  | WDR23 Isoform 1 o/e + tBHQ | 1.02 ± 0.25 |
| <i>ACADS</i>  | WDR23 Isoform 2 o/e        | 1.12 ± 0.20 |
| <i>ACADS</i>  | WDR23 Isoform 2 o/e + tBHQ | 0.89 ± 0.25 |
| <i>ACADL</i>  | Control                    | 1.00 ± 0.04 |
| <i>ACADL</i>  | Control + tBHQ             | 1.14 ± 0.06 |
| <i>ACADL</i>  | WDR23 Isoform 1 o/e        | 0.81 ± 0.04 |
| <i>ACADL</i>  | WDR23 Isoform 1 o/e + tBHQ | 0.77 ± 0.04 |
| <i>ACADL</i>  | WDR23 Isoform 2 o/e        | 0.77 ± 0.07 |
| <i>ACADL</i>  | WDR23 Isoform 2 o/e + tBHQ | 0.80 ± 0.05 |
| <i>GCLM</i>   | C57BL/6                    | 1.03 ± 0.11 |
| <i>GCLM</i>   | WDR23 KO                   | 1.33 ± 0.04 |
| <i>NQO1</i>   | C57BL/6                    | 1.03 ± 0.12 |

|             |          |              |
|-------------|----------|--------------|
| <i>NQO1</i> | WDR23 KO | 1.47 ± 0.05  |
| <i>GSR</i>  | C57BL/6  | 1.00 ± 0.009 |
| <i>GSR</i>  | WDR23 KO | 1.49 ± 0.02  |

#### Figure 3D-F

| Target        | Sample     | Fold Change    |
|---------------|------------|----------------|
| <i>gcs-1</i>  | WT (N2)    | 1.04 ± 0.22    |
| <i>gcs-1</i>  | Q80Stop    | 8.89 ± 1.39    |
| <i>gcs-1</i>  | D387N      | 2.07 ± 0.31    |
| <i>gcs-1</i>  | T400I      | 5.38 ± 0.23    |
| <i>gcs-1</i>  | W399Stop   | 5.91 ± 1.47    |
| <i>gcs-1</i>  | Frameshift | 5.97 ± 0.28    |
| <i>gcs-1</i>  | H310Y      | 2.38 ± 0.13    |
| <i>gcs-1</i>  | D313N      | 2.37 ± 0.28    |
| <i>gcs-1</i>  | G460R      | 1.66 ± 0.01    |
| <i>gst-4</i>  | WT (N2)    | 1.00 ± 0.09    |
| <i>gst-4</i>  | Q80Stop    | 146.78 ± 25.06 |
| <i>gst-4</i>  | D387N      | 14.36 ± 1.20   |
| <i>gst-4</i>  | T400I      | 66.22 ± 6.15   |
| <i>gst-4</i>  | W399Stop   | 61.44 ± 23.15  |
| <i>gst-4</i>  | Frameshift | 70.30 ± 1.47   |
| <i>gst-4</i>  | H310Y      | 29.33 ± 1.65   |
| <i>gst-4</i>  | D313N      | 53.83 ± 2.73   |
| <i>gst-4</i>  | G460R      | 13.44 ± 0.58   |
| <i>ugt-11</i> | WT (N2)    | 1.00 ± 0.04    |
| <i>ugt-11</i> | Q80Stop    | 5.26 ± 0.86    |
| <i>ugt-11</i> | D387N      | 4.10 ± 0.52    |
| <i>ugt-11</i> | T400I      | 4.83 ± 1.03    |
| <i>ugt-11</i> | W399Stop   | 15.38 ± 1.76   |
| <i>ugt-11</i> | Frameshift | 9.72 ± 1.44    |
| <i>ugt-11</i> | H310Y      | 6.03 ± 0.81    |
| <i>ugt-11</i> | D313N      | 1.71 ± 0.20    |
| <i>ugt-11</i> | G460R      | 4.01 ± 0.35    |

#### Figure 4D

| Target      | Sample                                  | Fold Change |
|-------------|-----------------------------------------|-------------|
| <i>GCLC</i> | Control                                 | 0.90 ± 0.06 |
| <i>GCLC</i> | <i>KEAP1</i> RNAi                       | 3.59 ± 1.26 |
| <i>GCLC</i> | WDR23 Isoform 1 o/e                     | 0.92 ± 0.02 |
| <i>GCLC</i> | <i>KEAP1</i> RNAi + WDR23 Isoform 1 o/e | 1.16 ± 0.09 |
| <i>GCLC</i> | WDR23 Isoform 2 o/e                     | 0.97 ± 0.03 |
| <i>GCLC</i> | <i>KEAP1</i> RNAi + WDR23 Isoform 2 o/e | 1.02 ± 0.05 |

#### Figure 6D-E

| Target       | Sample              | Fold Change |
|--------------|---------------------|-------------|
| <i>GSTA1</i> | Control             | 1.06 ± 0.12 |
| <i>GSTA1</i> | WDR23 Isoform 1 o/e | 0.60 ± 0.13 |
| <i>GSTA1</i> | WDR23 Isoform 2 o/e | 0.67 ± 0.14 |
| <i>PRDX1</i> | Control             | 1.03 ± 0.07 |
| <i>PRDX1</i> | WDR23 Isoform 1 o/e | 1.27 ± 0.16 |
| <i>PRDX1</i> | WDR23 Isoform 2 o/e | 0.82 ± 0.05 |

#### Figure S2C-Q

| <b>Target</b>  | <b>Sample</b>              | <b>Fold Change</b> |
|----------------|----------------------------|--------------------|
| <i>GCLM</i>    | Control                    | 1.05 ± 0.12        |
| <i>GCLM</i>    | WDR23 Isoform 1 o/e        | 1.05 ± 0.12        |
| <i>GCLM</i>    | WDR23 Isoform 2 o/e        | 0.81 ± 0.22        |
| <i>ABCC1</i>   | Control                    | 1.01 ± 0.05        |
| <i>ABCC1</i>   | WDR23 Isoform 1 o/e        | 1.14 ± 0.12        |
| <i>ABCC1</i>   | WDR23 Isoform 2 o/e        | 1.03 ± 0.17        |
| <i>CYP4A11</i> | Control                    | 1.24 ± 0.26        |
| <i>CYP4A11</i> | WDR23 Isoform 1 o/e        | 0.94 ± 0.14        |
| <i>CYP4A11</i> | WDR23 Isoform 2 o/e        | 0.79 ± 0.33        |
| <i>PRDX1</i>   | Control                    | 1.03 ± 0.10        |
| <i>PRDX1</i>   | Control + tBHQ             | 1.31 ± 0.06        |
| <i>PRDX1</i>   | WDR23 Isoform 1 o/e        | 1.02 ± 0.04        |
| <i>PRDX1</i>   | WDR23 Isoform 1 o/e + tBHQ | 1.17 ± 0.16        |
| <i>PRDX1</i>   | WDR23 Isoform 2 o/e        | 0.94 ± 0.03        |
| <i>PRDX1</i>   | WDR23 Isoform 2 o/e + tBHQ | 0.98 ± 0.13        |
| <i>NQO1</i>    | Control                    | 1.08 ± 0.14        |
| <i>NQO1</i>    | Control + tBHQ             | 3.72 ± 0.26        |
| <i>NQO1</i>    | WDR23 Isoform 1 o/e        | 1.06 ± 0.12        |
| <i>NQO1</i>    | WDR23 Isoform 1 o/e + tBHQ | 3.00 ± 0.30        |
| <i>NQO1</i>    | WDR23 Isoform 2 o/e        | 0.81 ± 0.26        |
| <i>NQO1</i>    | WDR23 Isoform 2 o/e + tBHQ | 4.05 ± 0.58        |
| <i>HO-1</i>    | Control                    | 1.18 ± 0.30        |
| <i>HO-1</i>    | Control + tBHQ             | 8.93 ± 1.30        |
| <i>HO-1</i>    | WDR23 Isoform 1 o/e        | 1.30 ± 0.18        |
| <i>HO-1</i>    | WDR23 Isoform 1 o/e + tBHQ | 13.67 ± 3.96       |
| <i>HO-1</i>    | WDR23 Isoform 2 o/e        | 1.09 ± 0.26        |
| <i>HO-1</i>    | WDR23 Isoform 2 o/e + tBHQ | 8.05 ± 1.54        |
| <i>KEAP1</i>   | Control                    | 1.09 ± 0.16        |
| <i>KEAP1</i>   | Control + tBHQ             | 1.73 ± 0.36        |
| <i>KEAP1</i>   | WDR23 Isoform 1 o/e        | 1.08 ± 0.32        |
| <i>KEAP1</i>   | WDR23 Isoform 1 o/e + tBHQ | 1.28 ± 0.11        |
| <i>KEAP1</i>   | WDR23 Isoform 2 o/e        | 0.79 ± 0.26        |
| <i>KEAP1</i>   | WDR23 Isoform 2 o/e + tBHQ | 1.24 ± 0.25        |
| <i>KEAP1</i>   | C57BL/6                    | 1.01 ± 0.10        |
| <i>KEAP1</i>   | WDR23 KO                   | 1.33 ± 0.13        |
| <i>SLBP</i>    | Control                    | 1.00 ± 0.21        |
| <i>SLBP</i>    | SLBP RNAi                  | 0.54 ± 0.09        |
| <i>SLBP</i>    | Control                    | 1.00 ± 0.26        |
| <i>SLBP</i>    | SLBP RNAi                  | 0.34 ± 0.40        |
| <i>NRF2</i>    | Control                    | 1.00 ± 0.15        |
| <i>NRF2</i>    | SLBP RNAi                  | 0.78 ± 0.02        |
| <i>HO-1</i>    | Control                    | 1.00 ± 0.09        |
| <i>HO-1</i>    | SLBP RNAi                  | 1.41 ± 0.30        |
| <i>ACADL</i>   | Control                    | 1.00 ± 0.31        |
| <i>ACADL</i>   | SLBP RNAi                  | 0.64 ± 0.33        |
| <i>GCLC</i>    | Control                    | 1.00 ± 0.28        |
| <i>GCLC</i>    | SLBP RNAi                  | 0.80 ± 0.13        |
| <i>NQO1</i>    | Control                    | 1.00 ± 0.21        |

|                   |                                         |                    |
|-------------------|-----------------------------------------|--------------------|
| <i>NQO1</i>       | <i>SLBP</i> RNAi                        | 0.60 ± 0.11        |
| <b>Figure S6A</b> |                                         |                    |
| <b>Target</b>     | <b>Sample</b>                           | <b>Fold Change</b> |
| <i>wdr-23</i>     | WT (N2)                                 | 1.00 ± 0.08        |
| <i>wdr-23</i>     | Q80Stop                                 | 2.53 ± 0.15        |
| <i>wdr-23</i>     | D387N                                   | 1.79 ± 0.08        |
| <i>wdr-23</i>     | T400I                                   | 3.72 ± 0.32        |
| <i>wdr-23</i>     | W399Stop                                | 2.49 ± 0.85        |
| <i>wdr-23</i>     | Frameshift                              | 3.65 ± 0.20        |
| <i>wdr-23</i>     | H310Y                                   | 2.00 ± 0.10        |
| <i>wdr-23</i>     | D313N                                   | 1.85 ± 0.12        |
| <i>wdr-23</i>     | G460R                                   | 1.64 ± 0.11        |
| <b>Figure S9A</b> |                                         |                    |
| <b>Target</b>     | <b>Sample</b>                           | <b>Fold Change</b> |
| <i>NQO1</i>       | Control                                 | 1.00 ± 0.05        |
| <i>NQO1</i>       | <i>KEAP1</i> RNAi                       | 1.76 ± 0.15        |
| <i>NQO1</i>       | WDR23 Isoform 1 o/e                     | 0.93 ± 0.03        |
| <i>NQO1</i>       | <i>KEAP1</i> RNAi + WDR23 Isoform 1 o/e | 1.94 ± 0.12        |
| <i>NQO1</i>       | WDR23 Isoform 2 o/e                     | 1.03 ± 0.04        |
| <i>NQO1</i>       | <i>KEAP1</i> RNAi + WDR23 Isoform 2 o/e | 1.82 ± 0.16        |
