# Supplementary material for: WDR23 regulates NRF2 independently of KEAP1
Source: PubMed Central journal article supplement (PMC5428976; doi:10.1371/journal.pgen.1006762), 2017-04-28
Supplement: pgen.1006762.s019.pdf [file pgen.1006762.s019.pdf]

**S8 Table. Luciferase assay values**

| <b>Figure 1D</b>    |             |
|---------------------|-------------|
| <b>Sample</b>       | <b>RLU</b>  |
| Control             | 1.00 ± 0.03 |
| WDR23 Isoform 1 o/e | 0.75 ± 0.02 |
| WDR23 Isoform 2 o/e | 0.73 ± 0.02 |

  

| <b>Figure 4C</b>                        |             |
|-----------------------------------------|-------------|
| <b>Sample</b>                           | <b>RLU</b>  |
| Control                                 | 1.00 ± 0.03 |
| <i>KEAP1</i> RNAi                       | 1.77 ± 0.11 |
| WDR23 Isoform 1 o/e                     | 0.75 ± 0.02 |
| <i>KEAP1</i> RNAi + WDR23 Isoform 1 o/e | 1.06 ± 0.05 |
| WDR23 Isoform 2 o/e                     | 0.73 ± 0.02 |
| <i>KEAP1</i> RNAi + WDR23 Isoform 2 o/e | 0.89 ± 0.03 |

  

| <b>Figure S2A-B</b>                         |             |
|---------------------------------------------|-------------|
| <b>Sample</b>                               | <b>RLU</b>  |
| Control                                     | 1.00 ± 0.09 |
| Ce WDR-23 Isoform 1 o/e                     | 0.97 ± 0.07 |
| Ce WDR-23 Isoform 2 o/e                     | 1.07 ± 0.04 |
| Control                                     | 1.00 ± 0.09 |
| <i>KEAP1</i> RNAi                           | 1.34 ± 0.09 |
| Ce WDR-23 Isoform 1 o/e                     | 0.97 ± 0.07 |
| <i>KEAP1</i> RNAi + Ce WDR-23 Isoform 1 o/e | 1.28 ± 0.08 |
| Ce WDR-23 Isoform 2 o/e                     | 1.07 ± 0.04 |
| <i>KEAP1</i> RNAi + Ce WDR-23 Isoform 2 o/e | 1.24 ± 0.05 |
