# Supplementary material for: WDR23 regulates NRF2 independently of KEAP1
Source: PubMed Central journal article supplement (PMC5428976; doi:10.1371/journal.pgen.1006762), 2017-04-28
Supplement: pgen.1006762.s020.pdf [file pgen.1006762.s020.pdf]

**S9 Table. Immunostaining values**

| <b>Figure 6C</b>               |                        |                       |
|--------------------------------|------------------------|-----------------------|
| <b>Sample</b>                  | <b>% of population</b> | <b># of cells (n)</b> |
| Control Diffuse #1             | 16                     | 21                    |
| Control Nuclear #1             | 84                     | 114                   |
| Control Diffuse #2             | 14                     | 22                    |
| Control Nuclear #2             | 86                     | 133                   |
| Control Diffuse #3             | 18                     | 35                    |
| Control Nuclear #3             | 82                     | 165                   |
| WDR23 Isoform 1 o/e Diffuse #1 | 59                     | 10                    |
| WDR23 Isoform 1 o/e Nuclear #1 | 41                     | 7                     |
| WDR23 Isoform 1 o/e Diffuse #2 | 76                     | 22                    |
| WDR23 Isoform 1 o/e Nuclear #2 | 24                     | 7                     |
| WDR23 Isoform 1 o/e Diffuse #3 | 82                     | 23                    |
| WDR23 Isoform 1 o/e Nuclear #3 | 18                     | 5                     |
| WDR23 Isoform 2 o/e Diffuse #1 | 70                     | 14                    |
| WDR23 Isoform 2 o/e Nuclear #1 | 30                     | 6                     |
| WDR23 Isoform 2 o/e Diffuse #2 | 44                     | 11                    |
| WDR23 Isoform 2 o/e Nuclear #2 | 56                     | 14                    |
| WDR23 Isoform 2 o/e Diffuse #3 | 72                     | 28                    |
| WDR23 Isoform 2 o/e Nuclear #3 | 28                     | 11                    |
| <b>Figure S11G</b>             |                        |                       |
| <b>Sample</b>                  | <b>% of population</b> | <b># of cells (n)</b> |
| Control Diffuse #1             | 12                     | 4                     |
| Control Nuclear #1             | 88                     | 30                    |
| Control Diffuse #2             | 9                      | 9                     |
| Control Nuclear #2             | 91                     | 80                    |
| Control Diffuse #3             | 4                      | 2                     |
| Control Nuclear #3             | 96                     | 54                    |
| Control Diffuse #4             | 7                      | 3                     |
| Control Nuclear #4             | 93                     | 43                    |
| WDR23 Isoform 1 o/e Diffuse #1 | 53                     | 23                    |
| WDR23 Isoform 1 o/e Nuclear #1 | 47                     | 20                    |
| WDR23 Isoform 1 o/e Diffuse #2 | 31                     | 31                    |
| WDR23 Isoform 1 o/e Nuclear #2 | 69                     | 67                    |
| WDR23 Isoform 1 o/e Diffuse #3 | 50                     | 7                     |
| WDR23 Isoform 1 o/e Nuclear #3 | 50                     | 7                     |
| WDR23 Isoform 1 o/e Diffuse #4 | 67                     | 22                    |
| WDR23 Isoform 1 o/e Nuclear #4 | 33                     | 11                    |
| WDR23 Isoform 2 o/e Diffuse #1 | 61                     | 11                    |
| WDR23 Isoform 2 o/e Nuclear #1 | 39                     | 18                    |
| WDR23 Isoform 2 o/e Diffuse #2 | 49                     | 23                    |
| WDR23 Isoform 2 o/e Nuclear #2 | 51                     | 24                    |
| WDR23 Isoform 2 o/e Diffuse #3 | 70                     | 19                    |
| WDR23 Isoform 2 o/e Nuclear #3 | 30                     | 8                     |
| WDR23 Isoform 2 o/e Diffuse #4 | 67                     | 18                    |
| WDR23 Isoform 2 o/e Nuclear #4 | 33                     | 9                     |
